# Supplementary material for: Three operational models for ambidexterity in large corporations
Source: Springer Nature journal article supplement (doi:10.1186/s40604-018-0053-9), 2018-08-22
Supplement: MOESM1 [file 16066810]

## Multilingual abstracts

### Arabic

#### Three operational models for ambidexterity in large corporations

Sverker Alänge, Annika Steiber

#### ثلاثة نماذج عملية لتطوير المهارات في الشركات الكبرى

تبحث هذه الورقة في المناهج الجديدة التي تتبعها الشركات الكبرى لتطوير مهاراتها وقدراتها على الاكتشاف والابتكار عبر استغلال طرق جديدة في العمل. تتناول هذه الورقة وتقارن ثلاثة نماذج لتعزيز الابتكار عن طريق إقامة الشراكات مع الجهات وحدة الابتكار المفتوح في "FirstBuild" الخارجية الفاعلة : وحدة تطوير المنتجات الجديدة في مجال الأجهزة المنزلية لا تزال النماذج في مراحلها الأولى إلا أنها بدأت تنتج وولدت نموذج أعمال "Lantmännen" ووحدة "Electrolux" للابتكارات, وزرعت بذور التغيير الثقافي في الشركات الأم, وبنت نظام ايكولوجي خارجي يتماشى مع الشركات الناشئة والمستثمرين الخواص

**الكلمات المفتاح:** المهارات, القدرات الدينامكية, الابتكار المفتوح, النماذج العملية
